# Supplementary material for: Effect of Prior Intensive Insulin Treatment During the Diabetes Control and Complications Trial (DCCT) on Peripheral Neuropathy in Type 1 Diabetes During the Epidemiology of Diabetes Interventions and Complications (EDIC) Study
Source: Oxford University Press journal article supplement (doi:10.2337/dc09-1941), 2010-02-11
Supplement: dc091941-sup-onlineappendix.pdf [file dc091941-sup-onlineappendix.pdf]

### Online-Only Appendix to:

“Effect of Prior Intensive Insulin Therapy on Peripheral Neuropathy in Type 1 Diabetes”

**Authors:** James W. Albers, MD, PhD,<sup>1</sup> William H. Herman, MD, MPH,<sup>2</sup> Eva L. Feldman,<sup>1</sup> MD, PhD, Rodica Pop-Busui, MD, PhD,<sup>2</sup> Catherine L. Martin, MS,<sup>2</sup> Patricia A. Cleary, MS,<sup>3</sup> Barbara H. Waberski, MS,<sup>3</sup> and John M. Lachin, ScD,<sup>3</sup> for the DCCT/EDIC Research Group\*

### Supplemental data to be made available electronically (Online-Only)

#### Nerve Conduction Studies

Surface temperatures were measured from the forearm, palm, anterior leg, and calf for the median motor, median sensory, peroneal, and sural recordings, respectively, immediately before and after each recording, as done in the DCCT. Electromyographers were provided with the DCCT closeout temperatures and instructed to approximate the temperatures to the extent possible. The averaged pre- and post-recording temperatures from the forearm, palm, anterior leg, and calf during NeuroEDIC were 33.1° C, 33.0° C, 32.4° C, and 32.0° C, respectively. These temperatures did not differ significantly from the DCCT closeout temperatures, and there were no significant treatment group differences in surfaces temperatures at DCCT closeout or EDIC year 13-14.

#### Statistical Analyses

When NCS responses were unelicitable, conduction velocity was recoded as the 1<sup>st</sup> percentile, latency as the 99<sup>th</sup> percentile, and amplitude as 0. The Wilcoxon rank-sum test assessed group differences in ordinal or quantitative variables, and the contingency Chi-square test for categorical variables. NCS values were ranked from lowest to highest, lower values reflecting greater abnormality, for all attributes except F response latency where higher values (indicating greater abnormality) were assigned lower ranking. Midranks were used for tied ranks. Rank-transformation analysis of covariance (ANCOVA) assessed group differences in the ranks of the 10 NCS measures in EDIC at DCCT baseline or closeout, adjusted for the mean NCS rank at DCCT closeout and both the DCCT and EDIC limb temperature during the nerve conduction study. The overall treatment group difference in the 10 NCS measures was assessed using the nonparametric Wei-Lachin rank test of stochastic ordering (11) that assesses whether one group on average tends to have better outcomes for all 10 measures than the other group.

Logistic regression models assessed group differences in, and other covariate effects on, the odds of an outcome. Analyses of prevalent neuropathy at EDIC year 13-14 employed all subjects assessed, whereas analyses of incident outcomes excluded subjects with the specific neuropathy outcome at the preceding evaluation. Models also adjusted for the average rank of NCS results at DCCT closeout to control for residual differences between groups.(12) Separate models adjusted for the average rank of all NCS measures, all leg measures, leg amplitude and conduction velocity measures, and peroneal and sural amplitude and peroneal conduction velocity. Additional covariates evaluated included age, sex, height, weight, body mass index (BMI), cardiovascular risk factors, and medications (analgesics and ACE/ARBs). A forward

stepwise selection procedure was used, and covariates having a P value <0.10 were included in the models. Interaction terms between treatment group and another covariate with  $p < 0.10$  were kept in the final models. For each neuropathy outcome, the 'best' model was selected based on the lowest value of the Akaike Information Criterion (AIC).<sup>(13)</sup>

Prior glycemic exposure was measured by the mean HbA1c level during DCCT (i.e. from month 3 to closeout) and during EDIC (from year 1 to the NCS at year 13-14).

Statistical analyses were performed using SAS V 8.2 (Cary, NC).

***Neurologists and Electromyographers –***

B. Katirji, P. Neal, K. Spencer, M.J. Brown, S.J. Bird, J. Christine, M. Rubin, I. Zaprianova, E.J. Angus, B.K. Ahmad, R. Freeman, R. Nardin, C. Gibbons, P. Siao Tick Chong, D. Cros, P.J. Dyck, J.R. Daube, J.E. Kurent, D. Freking, E. Aul, S. Mennen, L. Rios, W. Sebetka, D. Walk, R. Conway, J. Hoerner, D. Lacomis, S. Zivkovic, C. Shipes, S. Boksenbaum, S. Fedorek, T. Bertorini, S. Vernino, B. Brightman, A. Gordon, M. Weiss, G. Meekins, J. Distad, R. Chan, A. Kilroy, M.T. Al-Lozi, J. Goldstein, S., Novella, J. Verghese, S.A. Driss, N. Desai, C. Hafer-Macko, J. Russell, J.E. Chapin, J. Korthals, J. Teener, E.L. Feldman, J.W. Albers

**Table 1a.** Characteristics of NeuroEDIC participants at DCCT baseline, DCCT closeout, and EDIC year 13-14

| Characteristic                      | Group | N   | Primary Prevention |               |                 | N   | Secondary Intervention |               |                 |
|-------------------------------------|-------|-----|--------------------|---------------|-----------------|-----|------------------------|---------------|-----------------|
|                                     |       |     | DCCT Baseline      | DCCT Closeout | EDIC Year 13-14 |     | DCCT Baseline          | DCCT Closeout | EDIC Year 13-14 |
| Age, mean (SD), years               | INT   | 297 | 27 (7) *           | 33 (7) *      | 47 (7) *        | 306 | 28 (7) *               | 35 (7) *      | 49 (7) *        |
|                                     | CONV  | 296 | 26 (8)             | 32 (7)        | 46 (7)          | 287 | 27 (7)                 | 34 (6)        | 48 (6)          |
| Female, N (%)                       | INT   |     | 152 (51)           | 152 (51)      | 152 (51)        |     | 142 (46)               | 142 (46)      | 142 (46)        |
|                                     | CONV  |     | 128 (43)           | 128 (43)      | 128 (43)        |     | 140 (49)               | 140 (49)      | 140 (49)        |
| Height, mean (SD), cm               | INT   |     | 171 (10)           | 172 (10)      | 172 (9)         |     | 171 (10)               | 171 (9)       | 171 (9)         |
|                                     | CONV  |     | 172 (10)           | 173 (9)       | 173 (9)         |     | 171 (10)               | 172 (10)      | 172 (10)        |
| Weight, mean (SD), kg               | INT   |     | 68 (12)            | 78 (14) †     | 84 (17)         |     | 69 (10)                | 79 (14) †     | 84 (18)         |
|                                     | CONV  |     | 70 (13)            | 75 (13)       | 85 (18)         |     | 70 (12)                | 74 (12)       | 83 (16)         |
| BMI, mean (SD), kg/m <sup>2</sup>   | INT   |     | 23 (3)             | 27 (5) †      | 28 (5)          |     | 24 (3)                 | 27 (4) †      | 29 (5)          |
|                                     | CONV  |     | 23 (3)             | 25 (3)        | 28 (5)          |     | 24 (3)                 | 25 (3)        | 28 (5)          |
| BMI ≥ 30, kg/m <sup>2</sup>         | INT   |     | 4 (1)              | 54 (19) †     | 94 (32)         |     | 3 (1)                  | 61 (20) †     | 108 (36) *      |
|                                     | CONV  |     | 3 (1)              | 13 (4)        | 92 (32)         |     | 7 (2)                  | 14 (5)        | 80 (28)         |
| Diabetes duration, mean (SD), years | INT   |     | 2.5 (1.3)          | 8.6 (2.3)     | 22.4 (2.4)      |     | 8.9 (3.8)              | 16.0 (4.0)    | 29.7 (4.0)      |
|                                     | CONV  |     | 2.5 (1.3)          | 8.5 (2.3)     | 22.2 (2.4)      |     | 8.7 (3.7)              | 15.7 (4.0)    | 29.4 (4.1)      |
| HbA1c, mean (SD), %                 | INT   |     | 9.0 (1.7)          | 7.4 (1.0) †   | 7.9 (1.2)       |     | 9.2 (1.5)              | 7.3 (1.0) †   | 7.8 (1.2)       |
|                                     | CONV  |     | 8.9 (1.6)          | 9.2 (1.5)     | 7.8 (1.1)       |     | 9.0 (1.6)              | 9.0 (1.5)     | 7.7 (1.2)       |
| Systolic BP, mean (SD), mmHg        | INT   |     | 112 (11) †         | 115 (11)      | 121 (14)        |     | 114 (12) †             | 118 (12)      | 121 (14)        |
|                                     | CONV  |     | 114 (12)           | 115 (11)      | 119 (14)        |     | 116 (12)               | 118 (12)      | 122 (14)        |
| Diastolic BP, mean (SD), mmHg       | INT   |     | 72 (9)             | 74 (9)        | 75 (9)          |     | 73 (9)                 | 75 (8)        | 73 (9)          |
|                                     | CONV  |     | 72 (9)             | 73 (9)        | 74 (9)          |     | 74 (9)                 | 75 (9)        | 73 (9)          |
| Total cholesterol, mean (SD), mg/dl | INT   |     | 177 (33)           | 179 (30)      | 181 (37)        |     | 178 (34)               | 182 (32)      | 171 (35)        |
|                                     | CONV  |     | 169 (33)           | 180 (35)      | 172 (35)        |     | 178 (32)               | 186 (37)      | 174 (36)        |
| LDL cholesterol, mean (SD), mg/dl   | INT   |     | 110 (30)           | 111 (27)      | 106 (31)        |     | 111 (29)               | 114 (27)      | 99 (29)         |
|                                     | CONV  |     | 104 (29)           | 111 (30)      | 101 (30)        |     | 112 (28)               | 118 (31)      | 100 (31)        |
| Current smoker, N (%)               | INT   |     | 61 (21)            | 70 (24) *     | 47 (16)         |     | 64 (21)                | 64 (21)       | 40 (13)         |
|                                     | CONV  |     | 51 (17)            | 59 (20)       | 43 (15)         |     | 60 (21)                | 60 (21)       | 36 (13)         |
| Any ACE or ARB, N (%) ‡             | INT   |     |                    |               | 138 (46)        |     | 64 (21)                | 99 (34)       | 152 (50) *      |
|                                     | CONV  |     |                    |               | 134 (45)        |     | 73 (25)                | 101 (36)      | 167 (58)        |

|                                                      |      |         |          |
|------------------------------------------------------|------|---------|----------|
| Pain or numbness in hands/feet, N (%)                | INT  | 82 (28) | 103 (34) |
|                                                      | CONV | 73 (25) | 113 (39) |
| Medication for neuropathic pain in hands/feet, N (%) | INT  | 41 (24) | 41 (24)  |
|                                                      | CONV | 35 (20) | 35 (20)  |

INT former intensive treatment group, CONV former conventional treatment group, BMI body mass index

\* p<0.05 INT versus CONV

† p<0.01 INT versus CONV

‡ Data on medication use was not collected during the DCCT.

**Table 2a.** Prevalence of clinical (symptoms and signs) and nerve conduction study results suggestive of distal symmetrical polyneuropathy at DCCT baseline, DCCT closeout, and EDIC year 13-14

|                               |       | Primary Prevention |                  |                    | Secondary Intervention |                  |                    |
|-------------------------------|-------|--------------------|------------------|--------------------|------------------------|------------------|--------------------|
| Variable                      | Group | DCCT<br>Baseline   | DCCT<br>Closeout | EDIC Year<br>13-14 | DCCT<br>Baseline       | DCCT<br>Closeout | EDIC Year<br>13-14 |
| No. (%)                       |       |                    |                  |                    |                        |                  |                    |
| Clinical examination          |       |                    |                  |                    |                        |                  |                    |
| Symptoms                      | INT   | 11 (4)             | 15 (5)           | 52 (18)            | 21 (7)                 | 29 (10)          | 67 (22) **         |
|                               | CONV  | 16 (5)             | 28 (10)          | 71 (24)            | 23 (8)                 | 47 (16)          | 101 (35)           |
| Abnormal sensation            | INT   | 51 (17)            | 67 (23)          | 120 (40)           | 77 (25)                | 79 (26) **       | 128 (42) **        |
|                               | CONV  | 43 (15)            | 88 (30)          | 126 (43)           | 77 (27)                | 118 (42)         | 166 (58)           |
| Abnormal reflexes             | INT   | 33 (11)            | 40 (14) **       | 110 (37)           | 72 (24)                | 95 (32) **       | 154 (50)           |
|                               | CONV  | 27 (9)             | 81 (28)          | 126 (43)           | 66 (23)                | 131 (46)         | 166 (58)           |
| Clinical neuropathy           | INT   | 20 (7)             | 28 (10) **       | 93 (31)            | 37 (12)                | 60 (20) **       | 111 (36) **        |
|                               | CONV  | 12 (4)             | 43 (15)          | 101 (34)           | 36 (13)                | 85 (30)          | 139 (48)           |
| Electrophysiology             |       |                    |                  |                    |                        |                  |                    |
| Abnormal NCS                  | INT   | 59 (20)            | 60 (21) **       | 140 (47) **        | 126 (41)               | 104 (34) **      | 186 (61) **        |
|                               | CONV  | 64 (22)            | 119 (41)         | 185 (63)           | 132 (46)               | 169 (59)         | 216 (75)           |
| Primary Outcome               |       |                    |                  |                    |                        |                  |                    |
| Confirmed clinical neuropathy | INT   | 14 (5)             | 13 (4)           | 64 (22)            | 25 (8)                 | 39 (13) **       | 88 (29) **         |
|                               | CONV  | 5 (2)              | 28 (10)          | 83 (28)            | 26 (9)                 | 69 (24)          | 121 (42)           |

\* p<0.01; \*\* p<0.001 INT versus CONV

INT former intensive treatment group, CONV former conventional treatment group, NCS nerve conduction studies

**Table 3a.** Nerve conduction study results at DCCT baseline, DCCT closeout, and EDIC year 13-14

| Nerve/Attribute            | Abnormal Limit | Group | Primary Prevention |               | Secondary Intervention |               |               |                 |
|----------------------------|----------------|-------|--------------------|---------------|------------------------|---------------|---------------|-----------------|
|                            |                |       | DCCT Baseline      | DCCT Closeout | EDIC Year 13-14        | DCCT Baseline | DCCT Closeout | EDIC Year 13-14 |
| Median Motor               |                |       | median (5%, 95%)   |               |                        |               |               |                 |
| Amplitude, mV              | <4.2           | INT   | 10.4               | 10.2          | 9.1                    | 10.0          | 10.1          | 8.4             |
|                            |                |       | (4.0, 16.6)        | (5.4, 16.0)   | (4.4, 15.2)            | (4.6, 18.0)   | (4.8, 16.0)   | (3.9, 13.8)     |
|                            |                | CONV  | 10.0               | 10.2          | 9.3                    | 10.0          | 10.0          | 8.6             |
|                            |                |       | (5.0, 17.0)        | (5.5, 16.0)   | (4.5, 15.2)            | (4.2, 17.0)   | (4.8, 16.0)   | (3.7, 14.4)     |
| Conduction velocity, M/sec | <49.0          | INT   | 54.9               | 55.7 **       | 51.6                   | 53.3          | 54.3 **       | 51.2 **         |
|                            |                |       | (48.2, 61.4)       | (49.1, 62.0)  | (42.4, 58.1)           | (46.0, 61.0)  | (47.3, 60.2)  | (42.9, 58.7)    |
|                            |                | CONV  | 54.7               | 52.8          | 51.4                   | 52.8          | 51.9          | 50.0            |
|                            |                |       | (48.0, 60.9)       | (45.3, 60.1)  | (42.9, 58.3)           | (46.0, 59.7)  | (43.1, 58.8)  | (42.3, 57.3)    |
| F-wave latency, msec       | >31.8          | INT   | 27.6               | 27.3 **       | 29.3                   | 28.6          | 28.0 **       | 29.7            |
|                            |                |       | (24.0, 32.0)       | (24.0, 31.6)  | (25.4, 34.0)           | (24.0, 33.3)  | (24.4, 32.4)  | (25.4, 35.2)    |
|                            |                | CONV  | 27.8               | 28.5          | 29.7                   | 28.0          | 29.2          | 30.2            |
|                            |                |       | (23.7, 32.2)       | (24.7, 33.3)  | (25.4, 36.1)           | (24.3, 33.3)  | (24.8, 35.4)  | (25.8, 36.6)    |
| Median Sensory             |                |       |                    |               |                        |               |               |                 |
| Amplitude, μV              | <10.0          | INT   | 20.0               | 17.0          | 10.0                   | 16.0          | 12.5          | 9.0             |
|                            |                |       | (8.0, 50.0)        | (6.0, 45.0)   | (1.0, 29.0)            | (6.0, 41.0)   | (5.0, 43.0)   | (0.0, 29.0)     |
|                            |                | CONV  | 21.0               | 16.0          | 9.0                    | 19.0          | 12.0          | 7.0             |
|                            |                |       | (9.0, 55.0)        | (3.0, 42.0)   | (0.0, 32.0)            | (5.0, 45.0)   | (2.0, 36.0)   | (0.0, 29.0)     |
| Conduction velocity, M/sec | <48.0          | INT   | 53.0               | 53.1 *        | 45.0                   | 50.0          | 50.0 **       | 43.1            |
|                            |                |       | (41.9, 65.2)       | (39.0, 63.7)  | (25.9, 59.1)           | (36.7, 61.9)  | (34.4, 60.8)  | (25.9, 55.5)    |
|                            |                | CONV  | 54.0               | 51.7          | 43.8                   | 50.4          | 46.8          | 41.2            |
|                            |                |       | (40.3, 65.0)       | (37.0, 61.9)  | (25.9, 58.0)           | (38.0, 62.1)  | (32.5, 59.0)  | (25.9, 54.2)    |
| Peroneal Motor             |                |       |                    |               |                        |               |               |                 |
| Amplitude, mV              | <2.5           | INT   | 6.0                | 6.0 *         | 4.7 *                  | 5.0           | 5.2 **        | 3.8 **          |
|                            |                |       | (2.7, 11.0)        | (2.2, 10.3)   | (0.8, 9.2)             | (1.6, 10.0)   | (1.5, 10.0)   | (0.2, 8.0)      |
|                            |                | CONV  | 6.0                | 5.2           | 3.9                    | 5.0           | 4.4           | 3.0             |
|                            |                |       | (2.3, 11.5)        | (1.7, 10.5)   | (0.3, 7.9)             | (1.9, 10.0)   | (0.8, 9.5)    | (0.1, 7.4)      |

Prior Intensive Insulin Therapy and Neuropathy (Albers, et al.)

|                               |       |      |                      |                         |                         |                      |                         |                         |
|-------------------------------|-------|------|----------------------|-------------------------|-------------------------|----------------------|-------------------------|-------------------------|
| Conduction velocity, M/sec    | <40.0 | INT  | 45.0<br>(38.1, 52.0) | 45.8 **<br>(39.3, 52.4) | 42.6 **<br>(32.6, 50.0) | 42.6<br>(34.0, 49.2) | 44.0 **<br>(36.1, 51.7) | 41.7 **<br>(28.7, 49.1) |
|                               |       | CONV | 44.8<br>(37.9, 52.3) | 42.0<br>(34.4, 49.5)    | 41.1<br>(27.7, 48.4)    | 42.7<br>(34.2, 50.0) | 41.0<br>(32.4, 48.2)    | 40.0<br>(25.4, 46.7)    |
| F-wave latency, msec          | >56.0 | INT  | 49.8<br>(40.6, 59.0) | 49.4 **<br>(41.8, 69.8) | 52.4 *<br>(43.9, 74.0)  | 51.7<br>(43.0, 62.4) | 51.6 **<br>(42.3, 69.8) | 53.9 *<br>(44.4, 74.0)  |
|                               |       | CONV | 50.4<br>(39.0, 61.8) | 53.6<br>(42.3, 69.8)    | 54.1<br>(44.4, 74.0)    | 51.0<br>(41.1, 62.7) | 55.6<br>(44.4, 69.8)    | 56.0<br>(45.8, 74.0)    |
| <b>Sural Sensory</b>          |       |      |                      |                         |                         |                      |                         |                         |
| Amplitude, $\mu$ V            | <5.0  | INT  | 15.0<br>(2.0, 30.0)  | 12.0 **<br>(3.0, 28.0)  | 7.0<br>(0.0, 20.0)      | 10.0<br>(0.0, 24.0)  | 10.0 **<br>(0.0, 25.0)  | 6.0 **<br>(0.0, 17.0)   |
|                               |       | CONV | 15.0<br>(1.0, 30.0)  | 10.0<br>(0.0, 25.0)     | 7.0<br>(0.0, 18.0)      | 11.0<br>(0.0, 28.0)  | 7.0<br>(0.0, 20.0)      | 4.0<br>(0.0, 13.0)      |
| Conduction velocity, M/sec    | <40.0 | INT  | 45.8<br>(36.4, 56.0) | 46.6 **<br>(36.8, 58.3) | 42.4 *<br>(29.8, 53.8)  | 42.6<br>(32.6, 55.0) | 43.8 **<br>(35.6, 53.8) | 41.2 **<br>(29.8, 50.0) |
|                               |       | CONV | 46.6<br>(36.8, 56.0) | 43.7<br>(35.5, 53.8)    | 41.2<br>(29.8, 51.9)    | 43.7<br>(32.6, 54.4) | 41.6<br>(34.1, 50.3)    | 38.9<br>(29.8, 50.0)    |
| <b>Overall</b>                |       | Z =  | 0.97                 | 6.05                    | 2.40                    | 1.19                 | 6.01                    | 4.19                    |
| (test of stochastic ordering) |       | P =  | 0.3297               | <0.0001                 | 0.0164                  | 0.2359               | <0.0001                 | <0.0001                 |

\* p<0.01; \*\* p<0.001 INT versus CONV

INT former intensive treatment group, CONV former conventional treatment group

~ The test of stochastic ordering tests whether the majority of the measures show differences in a single direction, thus favoring one treatment group over the other

**Table 4a.** Incidence of clinical neuropathy, abnormal nerve conduction study, and confirmed clinical neuropathy at DCCT closeout and EDIC year 13-14 among subjects who did not fulfill the specific criterion for neuropathy at the preceding evaluation

|                               |       | Primary Prevention |                  |                    | Secondary Intervention |                  |                    |
|-------------------------------|-------|--------------------|------------------|--------------------|------------------------|------------------|--------------------|
| Variable                      | Group | DCCT<br>Baseline   | DCCT<br>Closeout | EDIC Year<br>13-14 | DCCT<br>Baseline       | DCCT<br>Closeout | EDIC Year<br>13-14 |
| No. (%)                       |       |                    |                  |                    |                        |                  |                    |
| Clinical neuropathy           | INT   | 20/295 (7)         | 20/269 (7)       | 75/263 (29)        | 37/305 (12)            | 37/264 (14) *    | 70/242 (29)        |
|                               | CONV  | 12/294 (4)         | 35/278 (13)      | 79/249 (32)        | 36/287 (13)            | 61/248 (25)      | 75/199 (38)        |
| Abnormal NCS                  | INT   | 59/295 (20)        | 35/231 (15) **   | 94/232 (41)        | 126/306 (41)           | 38/179 (21) **   | 101/198 (51)       |
|                               | CONV  | 64/295 (22)        | 70/228 (31)      | 81/174 (47)        | 132/287 (46)           | 67/154 (44)      | 70/116 (60)        |
| Confirmed clinical neuropathy | INT   | 14/295 (5)         | 7/275 (3) *      | 53/278 (19)        | 25/305 (8)             | 25/276 (9) **    | 64/263 (24)        |
|                               | CONV  | 5/294 (2)          | 24/285 (8)       | 65/264 (25)        | 26/287 (9)             | 51/258 (20)      | 71/215 (33)        |

INT former intensive treatment group, CONV former conventional treatment group, NCS nerve conduction studies

\* p<0.01; \*\* p<0.001 INT versus CONV; § p=0.0125

**Table 5a.** Adjusted odds of incident clinical neuropathy, abnormal NCS, and confirmed clinical neuropathy at EDIC Year 13-14 among former intensive- and conventional treatment group subjects who did not fulfill the specific criterion for neuropathy at DCCT closeout. The “best” models having the lowest Akaike Information Criteria (AIC) value are shown

| Logistic Regression Models    | EDIC Year 13-14  |                                                                                                                               |
|-------------------------------|------------------|-------------------------------------------------------------------------------------------------------------------------------|
|                               | Unadjusted       | Adjusted for average rank over NCS measures and age, sex, height, weight, BMI, cardiovascular risk factors, and medications * |
| Variable                      |                  | OR (95% CI)                                                                                                                   |
| Clinical neuropathy           | 0.77 (0.59-1.01) | 0.99 (0.73-1.34)                                                                                                              |
|                               |                  | <i>Age and height</i> , average rank of 3 leg NCS measures †                                                                  |
| Abnormal NCS                  | 0.76 (0.57-1.03) | 1.01 (0.72-1.41)                                                                                                              |
|                               |                  | <i>Weight</i> , average rank of all 10 NCS measures ‡                                                                         |
| Confirmed clinical neuropathy | 0.70 (0.52-0.93) | 1.17 (0.84-1.63)                                                                                                              |
|                               |                  | <i>Age and height</i> , average rank of all 10 NCS measures ‡                                                                 |

NCS nerve conduction studies, BMI body mass index

\* Covariates that entered into the models using a stepwise selection are indicated in *italics* with the OR (95% CI) for each model

† Adjusted for the average rank over 3 leg NCS measures at DCCT closeout: peroneal (amplitude and conduction velocity), sural (amplitude).

‡ Adjusted for the average rank over all 10 NCS measures at DCCT closeout: median motor (amplitude, conduction velocity, and F-wave latency), median sensory (amplitude and conduction velocity), peroneal (amplitude, conduction velocity, and F-wave latency), sural (amplitude, and conduction velocity).



**Table 6a.** Effect of total DCCT/EDIC glycemic exposure (per one-unit increase in mean HbA1c) on odds of prevalent (at EDIC year 13-14) or incident (during EDIC) clinical neuropathy, abnormal nerve conduction study, and confirmed clinical neuropathy (values in **bold** indicate a significant increase in the OR)

| Logistic Regression Models    |                 | Prevalent               | Emergent *              |
|-------------------------------|-----------------|-------------------------|-------------------------|
|                               |                 | OR (95% CI)             | OR (95% CI)             |
| Clinical neuropathy           | DCCT mean HbA1c | <b>1.17 (1.06-1.29)</b> | 1.07 (0.95-1.20)        |
|                               | EDIC mean HbA1c | <b>1.64 (1.44-1.88)</b> | <b>1.74 (1.48-2.03)</b> |
| Abnormal NCS                  | DCCT mean HbA1c | <b>1.43 (1.28-1.60)</b> | 1.14 (0.99-1.32)        |
|                               | EDIC mean HbA1c | <b>1.87 (1.61-2.18)</b> | <b>1.96 (1.63-2.36)</b> |
| Confirmed clinical neuropathy | DCCT mean HbA1c | <b>1.35 (1.21-1.50)</b> | <b>1.24 (1.10-1.41)</b> |
|                               | EDIC mean HbA1c | <b>1.80 (1.56-2.07)</b> | <b>1.82 (1.55-2.14)</b> |

NCS nerve conduction study, HbA1C glycosylated hemoglobin

Data is the proportional odds for a one-unit increase in DCCT or EDIC mean HbA1c on having the outcome, given all other variables are held constant.

\* Among those with intact function at DCCT closeout.
